# Supplementary material for: KPC-Producing Enterobacterales from Douro River, Portugal—Persistent Environmental Contamination by Putative Healthcare Settings
Source: MDPI journal article supplement (doi:10.3390/antibiotics12010062), 2022-12-29
Supplement: s1 [file s1]

## SUPPLEMENTAR MATERIAL

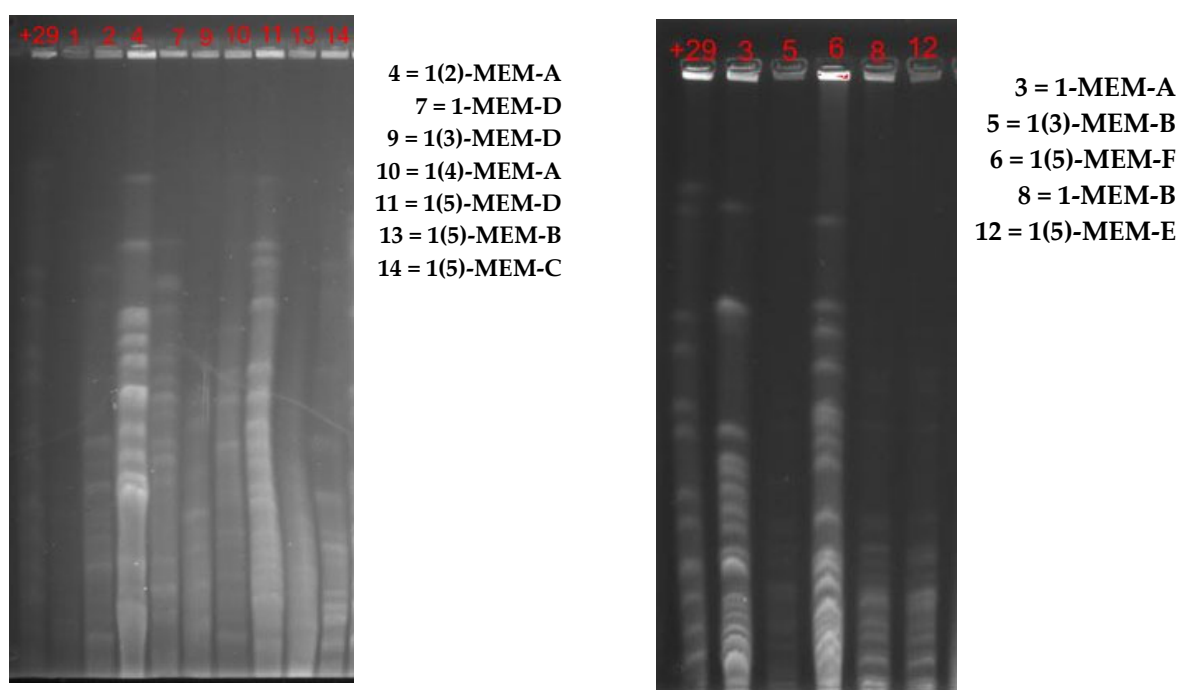

Was not possible to determine the PFGE pattern for the isolates 1(2)-MEM-C and 1(5)-MEM-A of *K. pneumoniae* and 1-MEM-D(2) of *E. coli*

**Figure S1.** PFGE pattern of KPC-producing *K. pneumoniae* 9 (a) and *E. coli* 6 (b) from river Douro waters.
